# Supplementary material for: Detection of Changes in Monoamine Neurotransmitters by the Neonicotinoid Pesticide Imidacloprid Using Mass Spectrometry
Source: MDPI journal article supplement (doi:10.3390/toxics10110696), 2022-11-17
Supplement: s1 [file s1]

**Table S1.** The accuracy, precision and linearity of monoamine analytical method.

| Compound  | Accuracy [%] |             |             | Precision [CV%] | Linearity [R <sup>2</sup> ] |
|-----------|--------------|-------------|-------------|-----------------|-----------------------------|
|           | 0.2 ppb      | 2 ppb       | 20 ppb      |                 |                             |
| 3-MT      | 99.6 ± 8.3   | 98.4 ± 6.5  | 104.4 ± 5.5 | 64.8            | 0.9998                      |
| Dopamine  | 135.8 ± 8.2  | 100.9 ± 3.1 | 100.2 ± 3.5 | 31.3            | 0.9998                      |
| Histamine | 269.4 ± 6.7  | 90.1 ± 4.1  | 100.4 ± 0.4 | 26.9            | 0.9995                      |
| Serotonin | 155.4 ± 28.0 | 94.7 ± 3.5  | 98.9 ± 2.2  | 11.6            | 0.9999                      |

CV, Coefficient of variation

These values were calculated from the measurement results and calibration curve used to calculate the MDL.

Accuracy was represented as the mean ± SE, and linearity was shown as R<sup>2</sup> on the calibration curve.
